# Supplementary material for: Zanubrutinib monotherapy for relapsed or refractory non-germinal center diffuse large B-cell lymphoma
Source: PubMed Central journal article supplement — Blood Adv. 2022 Mar 11;6(6):1629–36. doi: 10.1182/bloodadvances.2020003698 (PMC8941452; doi:10.1182/bloodadvances.2020003698), 2022-03-11
Supplement: advancesADV2020003698-suppl1.pdf [file advancesADV2020003698-suppl1.pdf]

**Supplement Figure 1. Subgroup Analysis of Overall Response Rate.** ECOG PS, Eastern Cooperative Oncology Group performance status; IPI, international prognostic index; LD<sub>i</sub>, longest diameter of a lesion.

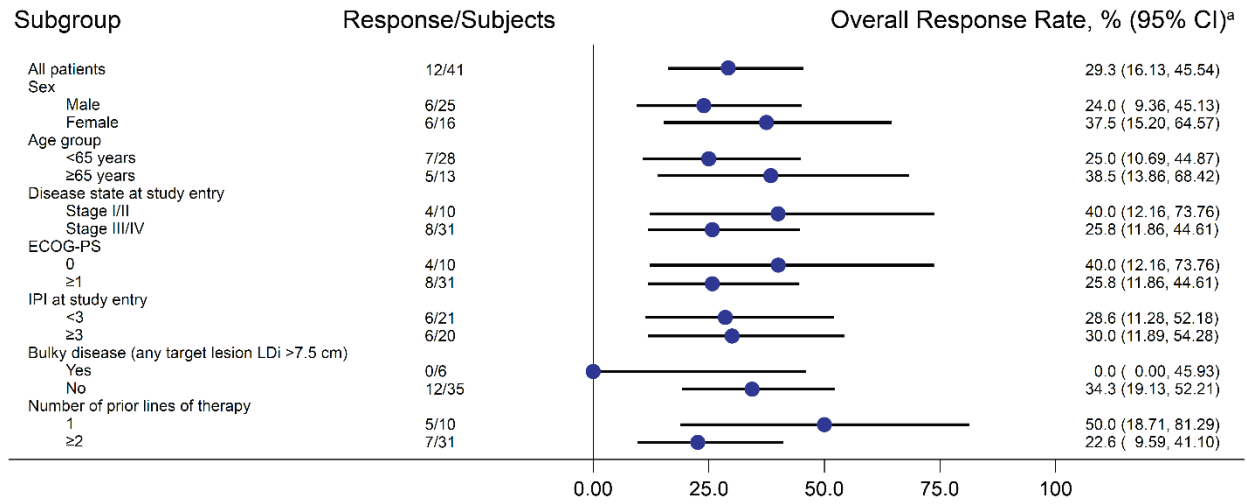

**Supplement Figure 2. Progression-Free Survival by GEP Subtype.**

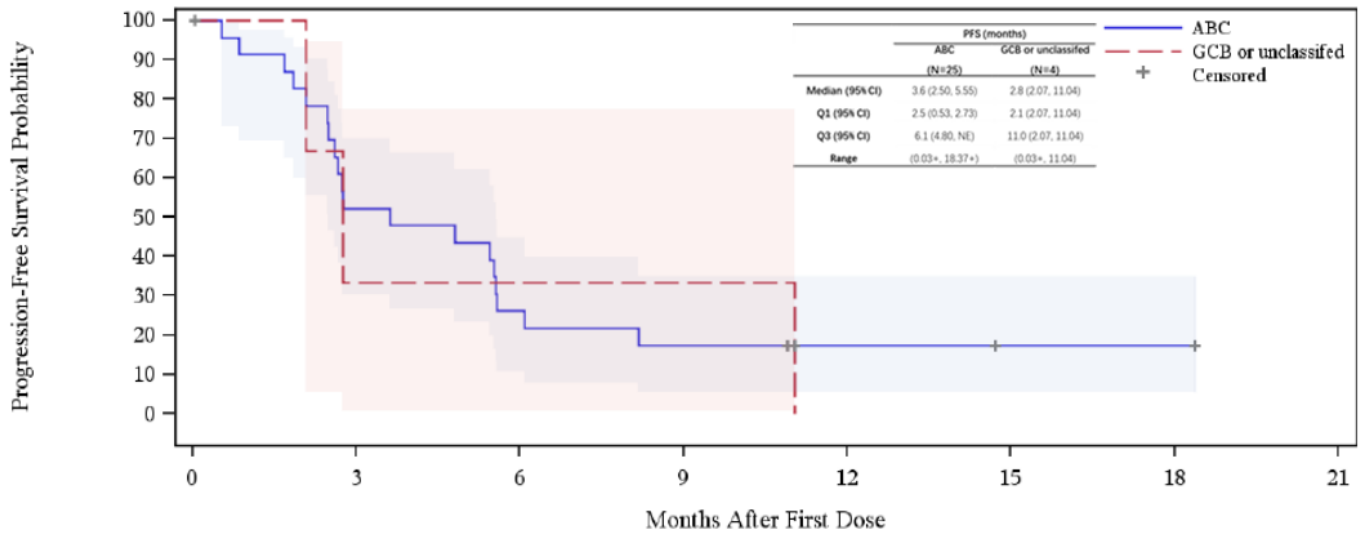

**Number of Subjects At Risk:**

|                     | 0  | 3  | 6 | 9 | 12 | 15 | 18 | 21 |
|---------------------|----|----|---|---|----|----|----|----|
| ABC                 | 25 | 12 | 6 | 4 | 2  | 1  | 1  | 0  |
| GCB or unclassified | 4  | 1  | 1 | 1 | 0  |    |    |    |

**Supplement Figure 3. Progression-Free Survival by Molecular Subgroups.**

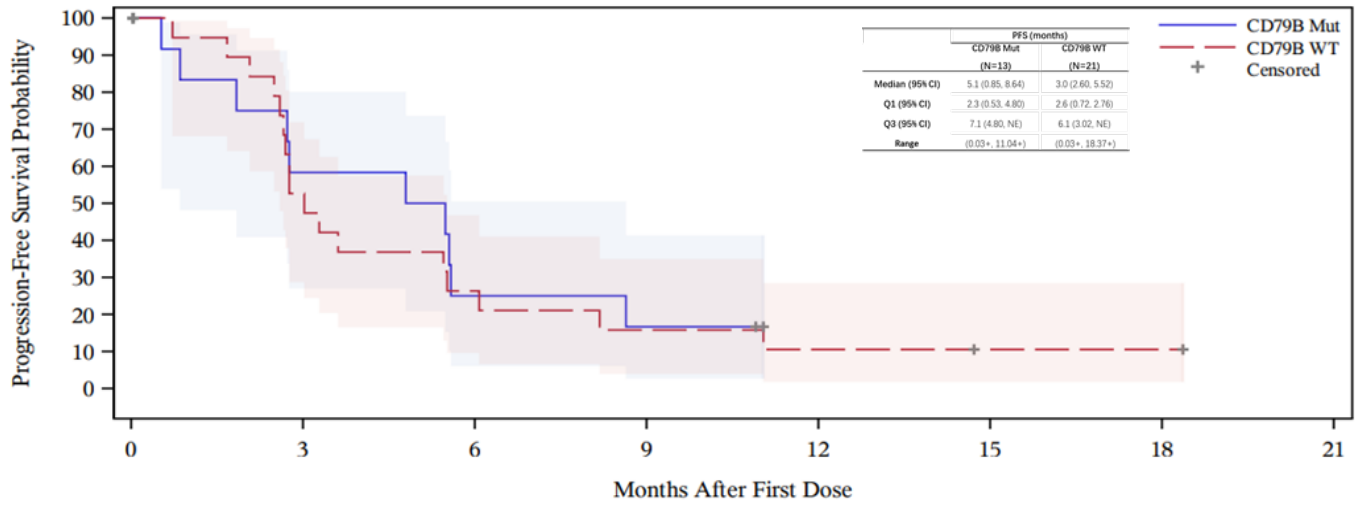

**Number of Subjects At Risk:**

|              | 0  | 3  | 6 | 9 | 12 | 15 | 18 | 21 |
|--------------|----|----|---|---|----|----|----|----|
| CD79B Mut 13 | 13 | 7  | 3 | 2 | 0  | 0  | 0  | 0  |
| CD79B WT 21  | 21 | 10 | 5 | 3 | 2  | 1  | 1  | 0  |

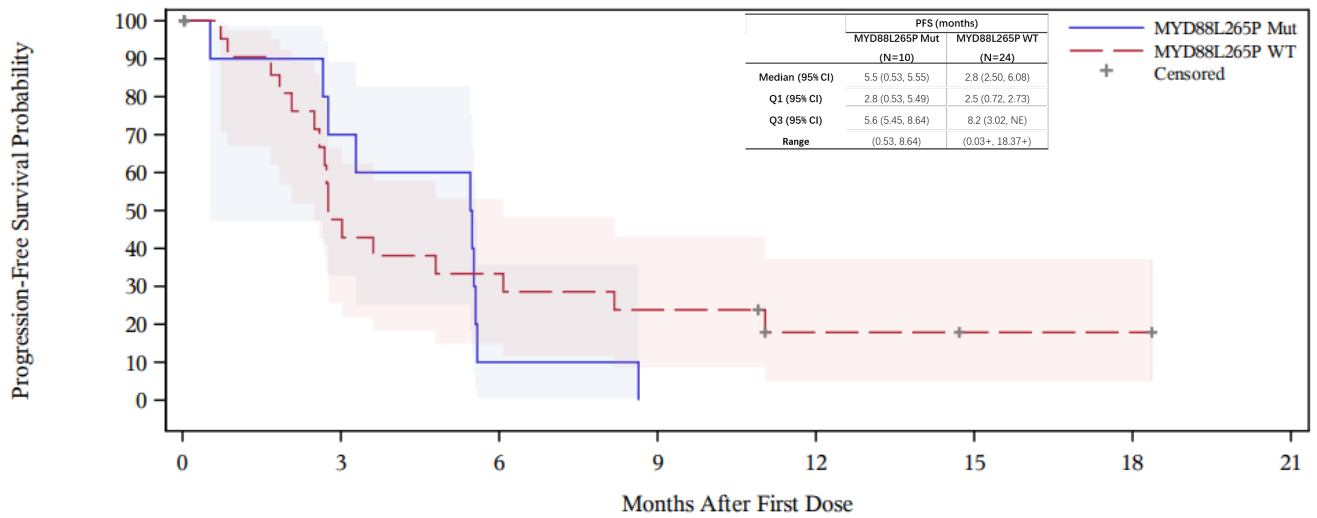

**Number of Subjects At Risk:**

|                   | 0  | 3  | 6 | 9 | 12 | 15 | 18 | 21 |
|-------------------|----|----|---|---|----|----|----|----|
| MYD88L265P Mut 10 | 10 | 7  | 1 | 0 | 0  | 0  | 0  | 0  |
| MYD88L265P WT 24  | 24 | 10 | 7 | 5 | 2  | 1  | 1  | 0  |
